# Supplementary material for: Testing of the therapeutic efficacy and safety of AMPA receptor RNA aptamers in an ALS mouse model
Source: PubMed Central journal article supplement (PMC8761490; doi:10.26508/lsa.202101193), 2022-01-12

Fig 2B original autoradiographic data by BSA-2500

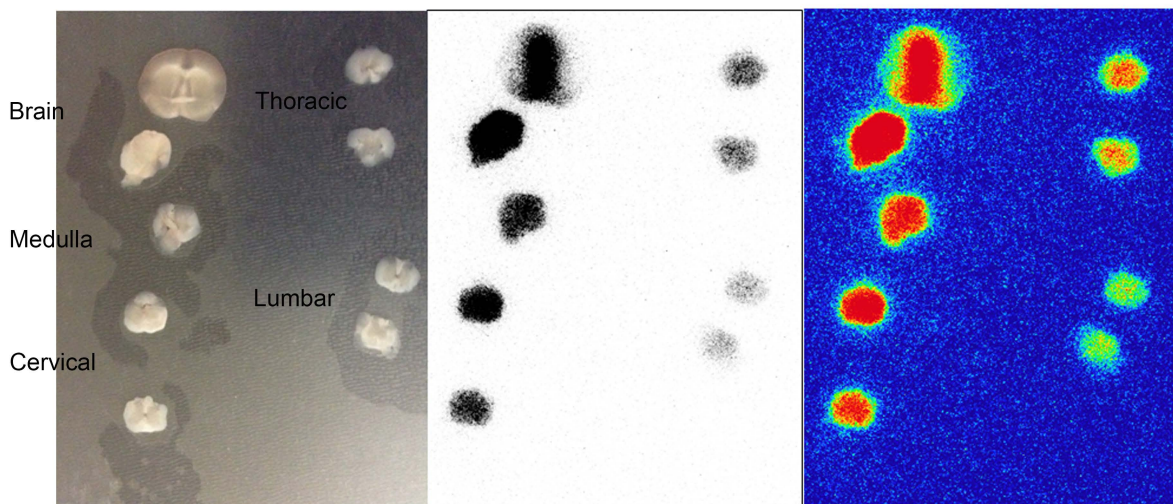

Fig 2D original electrophoretic blot

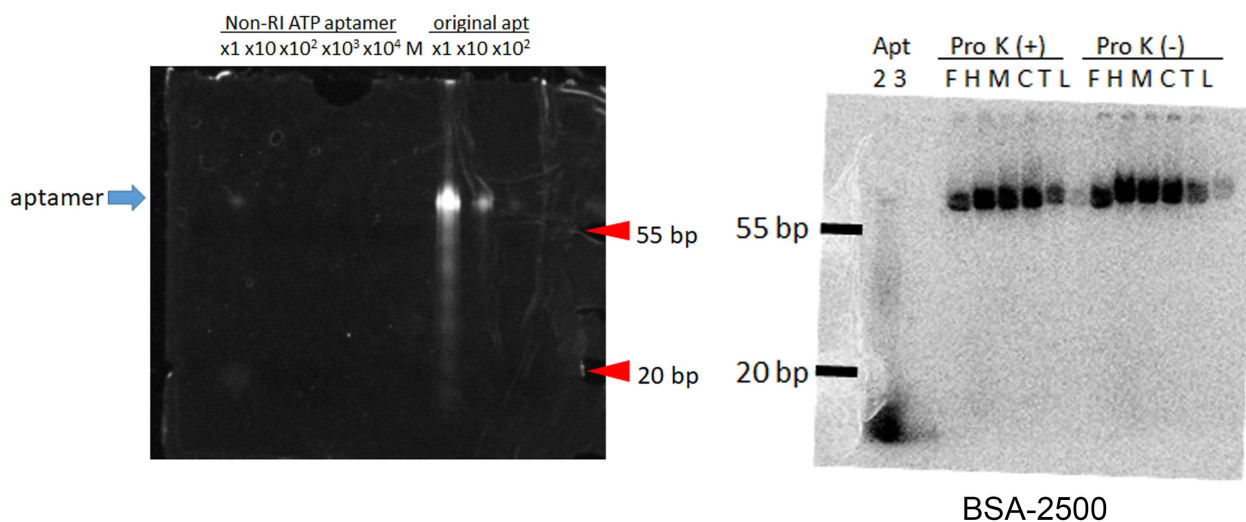

Supplement: LSA-2021-01193_SdataF2.1.pdf [file LSA-2021-01193_SdataF2.1.pdf]
