# Supplementary material for: Testing of the therapeutic efficacy and safety of AMPA receptor RNA aptamers in an ALS mouse model
Source: PubMed Central journal article supplement (PMC8761490; doi:10.26508/lsa.202101193), 2022-01-12

Fig 3B original microscopic picture (scale bar = 20  $\mu\text{m}$ )

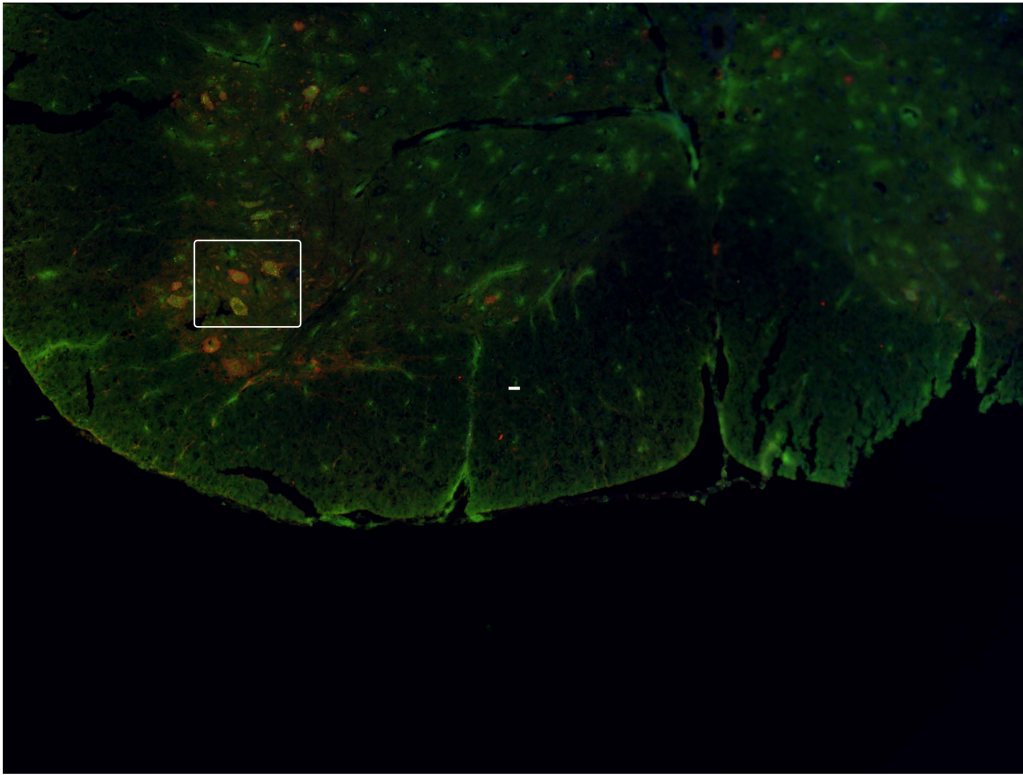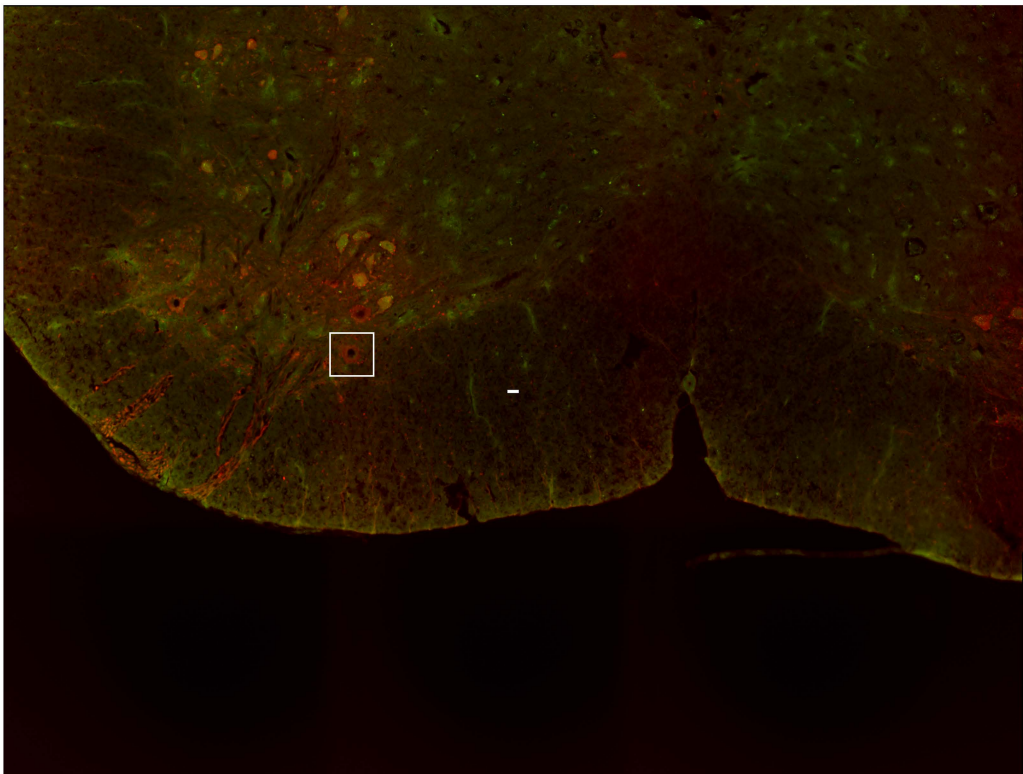

Supplement: LSA-2021-01193_SdataF3.2.pdf [file LSA-2021-01193_SdataF3.2.pdf]
