# Supplementary material for: Testing of the therapeutic efficacy and safety of AMPA receptor RNA aptamers in an ALS mouse model
Source: Life Sci Alliance. 2022 Jan 12;5(4):e202101193. doi: 10.26508/lsa.202101193 (PMC8761490; doi:10.26508/lsa.202101193)
Supplement: Supplementary file 1 [file LSA-2021-01193_TableS1.xlsx]

## Sheet: Sheet1
Table S1. Pharmacological properties of aptamers
Aptamer	Length (nt)	Potencya	Mechansim of Action	In Vivo Stability (t1/2)
FN1040b	101	2 µM	Noncompetitive	2.5 days
FN58c	58	3 µM	Competitive	> 7 days
footnote:
a: potency for AMPA receptors
b: for its sequence and properties, see Huang et al. ACS Chem. Neurosci. 2017, 8, 2437-45.
c: for its sequence, see Huang et al. Biochemistry 2007, 46, 12648-55.
