# Supplementary material for: Testing of the therapeutic efficacy and safety of AMPA receptor RNA aptamers in an ALS mouse model
Source: Life Sci Alliance. 2022 Jan 12;5(4):e202101193. doi: 10.26508/lsa.202101193 (PMC8761490; doi:10.26508/lsa.202101193)
Supplement: Supplementary file 4 [file LSA-2021-01193_SdataF3.1.xlsx]

## Sheet: Fig 3A
Source data for Fig 3A
moving and walking (sec)
	vehicle					FN1040					FN58					perampanel
15 min	162	54	0	0	0	139	39	94	62	0	0	0	0	0	0	7	54	15	111	14
30 min	174	101	29	33	3	156	33	50	120	0	88	44	0	53	7	0	2	16	15	6
60 min	177	149	173	173	175	106	174	150	175	148	148	136	83	89	149	0	0	0	5	4
24 hrs	177	180	180	180	180	180	180	173	180	178	177	50	63	64	133	133	136	130	132	173
Standing on hindkimbs (time/3min)
	vehicle					FN1040					FN58					perampanel
15 min	0	0	0	0	0	3	0	0	1	0	0	0	0	0	0	0	0	0	5	0
30 min	18	6	1	0	0	7	0	4	5	0	12	3	0	3	0	0	0	0	0	0
60 min	15	9	23	23	13	8	5	10	20	12	20	16	16	7	15	0	0	0	0	0
24 hrs	21	11	13	14	14	9	9	12	13	17	14	3	15	4	4	9	5	5	5	24
Table Analyzed	moving and walking											Table Analyzed	standing on hindlimbs
Two-way ANOVA	Ordinary											Two-way ANOVA	Ordinary
Alpha	0.05											Alpha	0.05
Source of Variation	% of total variation	P value	P value summary	Significant?								Source of Variation	% of total variation	P value	P value summary	Significant?
Interaction	14.29	0.0004	***	Yes								Interaction	14.91	0.0021	**	Yes
Row Factor	42.05	<0.0001	****	Yes								Row Factor	42.78	<0.0001	****	Yes
Column Factor	18.54	<0.0001	****	Yes								Column Factor	10.47	0.0004	***	Yes
ANOVA table	SS	DF	MS	F (DFn, DFd)	P value							ANOVA table	SS	DF	MS	F (DFn, DFd)	P value
Interaction	57625	9	6403	F (9, 64) = 4.045	P=0.0004							Interaction	603	9	67	F (9, 64) = 3.331	P=0.0021
Row Factor	169608	3	56536	F (3, 64) = 35.72	P<0.0001							Row Factor	1730	3	576.6	F (3, 64) = 28.67	P<0.0001
Column Factor	74773	3	24924	F (3, 64) = 15.75	P<0.0001							Column Factor	423.4	3	141.1	F (3, 64) = 7.018	P=0.0004
Residual	101302	64	1583									Residual	1287	64	20.11
Data summary												Data summary
Number of columns (Column Factor)	4											Number of columns (Column Factor)	4
Number of rows (Row Factor)	4											Number of rows (Row Factor)	4
Number of values	80											Number of values	80
Within each row, compare columns (simple effects within rows)
												Within each row, compare columns (simple effects within rows)
Number of families	4
Number of comparisons per family	6											Number of families	4
Alpha	0.05											Number of comparisons per family	6
												Alpha	0.05
Tukey's multiple comparisons test	Mean Diff.	95.00% CI of diff.	Below threshold?	Summary	Adjusted P Value
												Tukey's multiple comparisons test	Mean Diff.	95.00% CI of diff.	Below threshold?	Summary	Adjusted P Value
Row 1
vehicle vs. FN1040	-23.6	-89.97 to 42.77	No	ns	0.7846							Row 1
vehicle vs. FN58	43.2	-23.17 to 109.6	No	ns	0.3235							vehicle vs. FN1040	-0.8	-8.282 to 6.682	No	ns	0.9921
vehicle vs. perampanel	3	-63.37 to 69.37	No	ns	0.9994							vehicle vs. FN58	0	-7.482 to 7.482	No	ns	>0.9999
FN1040 vs. FN58	66.8	0.4260 to 133.2	Yes	*	0.048							vehicle vs. perampanel	-1	-8.482 to 6.482	No	ns	0.9848
FN1040 vs. perampanel	26.6	-39.77 to 92.97	No	ns	0.7166							FN1040 vs. FN58	0.8	-6.682 to 8.282	No	ns	0.9921
FN58 vs. perampanel	-40.2	-106.6 to 26.17	No	ns	0.3872							FN1040 vs. perampanel	-0.2	-7.682 to 7.282	No	ns	0.9999
												FN58 vs. perampanel	-1	-8.482 to 6.482	No	ns	0.9848
Row 2
vehicle vs. FN1040	-3.8	-70.17 to 62.57	No	ns	0.9988							Row 2
vehicle vs. FN58	29.6	-36.77 to 95.97	No	ns	0.6438							vehicle vs. FN1040	1.8	-5.682 to 9.282	No	ns	0.9205
vehicle vs. perampanel	60.2	-6.174 to 126.6	No	ns	0.0888							vehicle vs. FN58	1.4	-6.082 to 8.882	No	ns	0.9602
FN1040 vs. FN58	33.4	-32.97 to 99.77	No	ns	0.5492							vehicle vs. perampanel	5	-2.482 to 12.48	No	ns	0.3006
FN1040 vs. perampanel	64	-2.374 to 130.4	No	ns	0.0627							FN1040 vs. FN58	-0.4	-7.882 to 7.082	No	ns	0.999
FN58 vs. perampanel	30.6	-35.77 to 96.97	No	ns	0.619							FN1040 vs. perampanel	3.2	-4.282 to 10.68	No	ns	0.6736
												FN58 vs. perampanel	3.6	-3.882 to 11.08	No	ns	0.5857
Row 3
vehicle vs. FN1040	18.8	-47.57 to 85.17	No	ns	0.8775							Row 3
vehicle vs. FN58	48.4	-17.97 to 114.8	No	ns	0.2286							vehicle vs. FN1040	5.6	-1.882 to 13.08	No	ns	0.2084
vehicle vs. perampanel	167.6	101.2 to 234.0	Yes	****	<0.0001							vehicle vs. FN58	1.8	-5.682 to 9.282	No	ns	0.9205
FN1040 vs. FN58	29.6	-36.77 to 95.97	No	ns	0.6438							vehicle vs. perampanel	16.6	9.118 to 24.08	Yes	****	<0.0001
FN1040 vs. perampanel	148.8	82.43 to 215.2	Yes	****	<0.0001							FN1040 vs. FN58	-3.8	-11.28 to 3.682	No	ns	0.5414
FN58 vs. perampanel	119.2	52.83 to 185.6	Yes	****	<0.0001							FN1040 vs. perampanel	11	3.518 to 18.48	Yes	**	0.0014
												FN58 vs. perampanel	14.8	7.318 to 22.28	Yes	****	<0.0001
Row 5
vehicle vs. FN1040	1.2	-65.17 to 67.57	No	ns	>0.9999							Row 5
vehicle vs. FN58	82	15.63 to 148.4	Yes	**	0.0095							vehicle vs. FN1040	2.6	-4.882 to 10.08	No	ns	0.796
vehicle vs. perampanel	38.6	-27.77 to 105.0	No	ns	0.4235							vehicle vs. FN58	6.6	-0.8819 to 14.08	No	ns	0.1026
FN1040 vs. FN58	80.8	14.43 to 147.2	Yes	*	0.0109							vehicle vs. perampanel	5	-2.482 to 12.48	No	ns	0.3006
FN1040 vs. perampanel	37.4	-28.97 to 103.8	No	ns	0.4516							FN1040 vs. FN58	4	-3.482 to 11.48	No	ns	0.4977
FN58 vs. perampanel	-43.4	-109.8 to 22.97	No	ns	0.3195							FN1040 vs. perampanel	2.4	-5.082 to 9.882	No	ns	0.8322
												FN58 vs. perampanel	-1.6	-9.082 to 5.882	No	ns	0.9423
Test details	Mean 1	Mean 2	Mean Diff.	SE of diff.	N1	N2	q	DF
												Test details	Mean 1	Mean 2	Mean Diff.	SE of diff.	N1	N2	q	DF
Row 1
vehicle vs. FN1040	43.2	66.8	-23.6	25.16	5	5	1.326	64				Row 1
vehicle vs. FN58	43.2	0	43.2	25.16	5	5	2.428	64				vehicle vs. FN1040	0	0.8	-0.8	2.836	5	5	0.3989	64
vehicle vs. perampanel	43.2	40.2	3	25.16	5	5	0.1686	64				vehicle vs. FN58	0	0	0	2.836	5	5	0	64
FN1040 vs. FN58	66.8	0	66.8	25.16	5	5	3.754	64				vehicle vs. perampanel	0	1	-1	2.836	5	5	0.4986	64
FN1040 vs. perampanel	66.8	40.2	26.6	25.16	5	5	1.495	64				FN1040 vs. FN58	0.8	0	0.8	2.836	5	5	0.3989	64
FN58 vs. perampanel	0	40.2	-40.2	25.16	5	5	2.259	64				FN1040 vs. perampanel	0.8	1	-0.2	2.836	5	5	0.09972	64
												FN58 vs. perampanel	0	1	-1	2.836	5	5	0.4986	64
Row 2
vehicle vs. FN1040	68	71.8	-3.8	25.16	5	5	0.2136	64				Row 2
vehicle vs. FN58	68	38.4	29.6	25.16	5	5	1.664	64				vehicle vs. FN1040	5	3.2	1.8	2.836	5	5	0.8975	64
vehicle vs. perampanel	68	7.8	60.2	25.16	5	5	3.383	64				vehicle vs. FN58	5	3.6	1.4	2.836	5	5	0.698	64
FN1040 vs. FN58	71.8	38.4	33.4	25.16	5	5	1.877	64				vehicle vs. perampanel	5	0	5	2.836	5	5	2.493	64
FN1040 vs. perampanel	71.8	7.8	64	25.16	5	5	3.597	64				FN1040 vs. FN58	3.2	3.6	-0.4	2.836	5	5	0.1994	64
FN58 vs. perampanel	38.4	7.8	30.6	25.16	5	5	1.72	64				FN1040 vs. perampanel	3.2	0	3.2	2.836	5	5	1.596	64
												FN58 vs. perampanel	3.6	0	3.6	2.836	5	5	1.795	64
Row 3
vehicle vs. FN1040	169.4	150.6	18.8	25.16	5	5	1.057	64				Row 3
vehicle vs. FN58	169.4	121	48.4	25.16	5	5	2.72	64				vehicle vs. FN1040	16.6	11	5.6	2.836	5	5	2.792	64
vehicle vs. perampanel	169.4	1.8	167.6	25.16	5	5	9.42	64				vehicle vs. FN58	16.6	14.8	1.8	2.836	5	5	0.8975	64
FN1040 vs. FN58	150.6	121	29.6	25.16	5	5	1.664	64				vehicle vs. perampanel	16.6	0	16.6	2.836	5	5	8.277	64
FN1040 vs. perampanel	150.6	1.8	148.8	25.16	5	5	8.363	64				FN1040 vs. FN58	11	14.8	-3.8	2.836	5	5	1.895	64
FN58 vs. perampanel	121	1.8	119.2	25.16	5	5	6.699	64				FN1040 vs. perampanel	11	0	11	2.836	5	5	5.485	64
												FN58 vs. perampanel	14.8	0	14.8	2.836	5	5	7.379	64
Row 5
vehicle vs. FN1040	179.4	178.2	1.2	25.16	5	5	0.06744	64				Row 5
vehicle vs. FN58	179.4	97.4	82	25.16	5	5	4.609	64				vehicle vs. FN1040	14.6	12	2.6	2.836	5	5	1.296	64
vehicle vs. perampanel	179.4	140.8	38.6	25.16	5	5	2.169	64				vehicle vs. FN58	14.6	8	6.6	2.836	5	5	3.291	64
FN1040 vs. FN58	178.2	97.4	80.8	25.16	5	5	4.541	64				vehicle vs. perampanel	14.6	9.6	5	2.836	5	5	2.493	64
FN1040 vs. perampanel	178.2	140.8	37.4	25.16	5	5	2.102	64				FN1040 vs. FN58	12	8	4	2.836	5	5	1.994	64
FN58 vs. perampanel	97.4	140.8	-43.4	25.16	5	5	2.439	64				FN1040 vs. perampanel	12	9.6	2.4	2.836	5	5	1.197	64
												FN58 vs. perampanel	8	9.6	-1.6	2.836	5	5	0.7978	64

## Sheet: Fig 3D
Source data for Fig 3D
C57BL6 (wt)-1	C57BL6 (wt)-2	C57BL6 (wt)-3	0 µM-1	0 µM-2	0 µM-3	5 µM-1	5 µM-2	5 µM-3	10 µM-1	10 µM-2	10 µM-3	20 µM-1	20 µM-2	20 µM-3
8	17	15	5	5	13	5	4	17	7	16	13	12	8	18
8	11	16	4	10	3	9	4	3	12	13	13	8	12	24
10	15	16	3	3	14	2	7	6	3	7	5	9	16	17
11	12	20	5	8	2	14	3	6	6	7	11	12	12	16
12	15	15	2	4	10	6	4	7	9	11	10	10	10	9
7	13	9	6	14	7	8	9	12	7	5	11	13	15	15
C57BL6 (wt)			0			5			10			20
Mean	SEM	N	Mean	SEM	N	Mean	SEM	N	Mean	SEM	N	Mean	SEM	N
9.333	0.8028	6	4.167	0.6009	6	7.333	1.667	6	7.333	1.229	6	10.67	0.8028	6
13.83	0.9098	6	7.333	1.706	6	5.167	0.9458	6	9.833	1.721	6	12.17	1.222	6
15.17	1.447	6	8.167	2.056	6	8.5	2.078	6	10.5	1.204	6	16.5	1.979	6
Table Analyzed	FN1040 conc #MN n=3
Two-way ANOVA	Ordinary
Alpha	0.05
Source of Variation	% of total variation	P value	P value summary	Significant?
Interaction	5.242	0.4152	ns	No
Row Factor	12.21	0.0002	***	Yes
Column Factor	35.24	<0.0001	****	Yes
ANOVA table	SS	DF	MS	F (DFn, DFd)	P value
Interaction	103.1	8	12.89	F (8, 75) = 1.039	P=0.4152
Row Factor	240.2	2	120.1	F (2, 75) = 9.676	P=0.0002
Column Factor	693.4	4	173.4	F (4, 75) = 13.97	P<0.0001
Residual	931	75	12.41
Data summary
Number of columns (Column Factor)	5
Number of rows (Row Factor)	3
Number of values	90
Compare column means (main column effect)
Number of families	1
Number of comparisons per family	10
Alpha	0.05
Tukey's multiple comparisons test	Mean Diff.	95.00% CI of diff.	Below threshold?	Summary	Adjusted P Value
C57BL6 (wt) vs. 0	6.222	2.939 to 9.505	Yes	****	<0.0001
C57BL6 (wt) vs. 5	5.778	2.495 to 9.060	Yes	****	<0.0001
C57BL6 (wt) vs. 10	3.556	0.2729 to 6.838	Yes	*	0.0271
C57BL6 (wt) vs. 20	-0.3357	-3.618 to 2.947	No	ns	0.9985
0 vs. 5	-0.4443	-3.727 to 2.838	No	ns	0.9956
0 vs. 10	-2.666	-5.949 to 0.6164	No	ns	0.1661
0 vs. 20	-6.558	-9.840 to -3.275	Yes	****	<0.0001
5 vs. 10	-2.222	-5.505 to 1.061	No	ns	0.3306
5 vs. 20	-6.113	-9.396 to -2.831	Yes	****	<0.0001
10 vs. 20	-3.891	-7.174 to -0.6086	Yes	*	0.012
Test details	Mean 1	Mean 2	Mean Diff.	SE of diff.	N1	N2	q	DF
C57BL6 (wt) vs. 0	12.78	6.556	6.222	1.174	18	18	7.493	75
C57BL6 (wt) vs. 5	12.78	7	5.778	1.174	18	18	6.957	75
C57BL6 (wt) vs. 10	12.78	9.222	3.556	1.174	18	18	4.282	75
C57BL6 (wt) vs. 20	12.78	13.11	-0.3357	1.174	18	18	0.4042	75
0 vs. 5	6.556	7	-0.4443	1.174	18	18	0.5351	75
0 vs. 10	6.556	9.222	-2.666	1.174	18	18	3.211	75
0 vs. 20	6.556	13.11	-6.558	1.174	18	18	7.897	75
5 vs. 10	7	9.222	-2.222	1.174	18	18	2.676	75
5 vs. 20	7	13.11	-6.113	1.174	18	18	7.362	75
10 vs. 20	9.222	13.11	-3.891	1.174	18	18	4.686	75

## Sheet: Fig 3E
Source data for Fig 3E
C57BL6 (wt)-1						C57BL6 (wt)-2						C57BL6 (wt)-3						0 µM-1						0 µM-2						0 µM-3						5 µM-1						5 µM-2						5 µM-3
29	39	39	44	34	32	34	32	44	42	42	45	41	33	37	34	27	34	32	22	23	27	25	19	26	18	32	27	36	33	33	27	23	22	23	27	19	39	20	24	29	23	28	18	31	28	36	39	23	24
20	45	33	29	37	28	30	27	41	39	31	36	33	24	22	33	27	28	22	21	26	39	25	22	23	19	24	20	25	29	19	29	29	21	30	29	26	36	21	27	21	43	33	22	45	29	24	38	32	23
26	23	37	37	28	23	36	30	40	38	28	46	34	23	22	28	36	38	22	25	28	20		18	19	24	18	42	23	32	18	18	31		26	28	25	29		27	18	43	20	28	20	28	29	24	34	33
43	24	27	27	33	29	27	27	31	41	24	24	22	27	23	26	27	47	19	28		19		24	35	24		19	20	25	20		31		32	21	18	24		41	33	31	25	32	26		33	37	37
40	18	30	24	25	30	25	18	34	36	24	32	34	39	28	26	30	41	20			22		28	28	20		20		31	24		33		29	24	23	19		24	22	37			38			27	25
19	49	31	39	35	36	24	41	30	32	19	52	29	29	27	43	34	45						19		19		18		19	21		26		31	26		19		20	33	32			29			21	29
33	20	35	50	51	28	29	39	37	35	42	43	33	31	46	23	28	39								21		22		28	20		29		27	27		24		19		26			33			36	30
18	30	40	29	25		32	45	27	39	46	43	32	34	24	29	25	41								25		25		24	20		24		23			26		25		21						20	35
		23	29	39		37	25	28	53	47	30	43	26	25	30	34	33								19				18	22		22		22			21		31								28	31
		23	21	48		23	20	34	50	57	37	29	25	29	26	28									22				31	32		28		23					19									33
			18	26		33	25	38	28	32	30	28	44	36	21	33													25	18		23							23									27
				20		33		20	41	34	52	32	48	27	31	32													25	21		22							30									23
						37		42		23	22	41	20	33	36	25													28	18		22							26									27
						43		26		23		37	39	41	29	45													22			22							19									23
						28		23		24		35	41	19	21	36																																32
						44							23	26	38																																	22
						26									37																																	22
															47
															38
															30
C57BL6 (wt)			0			5			10			20
Mean	SEM	N	Mean	SEM	N	Mean	SEM	N	Mean	SEM	N	Mean	SEM	N
29.83	1.446	12	22.99	0.9544	6	25.25	0.9244	14	27.07	1	12	26.68	1.315	13
33.75	1.251	17	24.26	0.7953	14	28.59	1.527	9	27.14	1.08	16	28.44	1.016	16
32.95	1.021	20	24.1	0.7031	14	26.31	0.867	17	29.09	0.8906	13	27.05	0.7968	24
Table Analyzed	FN1040 conc size n=3
Two-way ANOVA	Ordinary
Alpha	0.05
Source of Variation	% of total variation	P value	P value summary	Significant?
Interaction	2.182	0.5421	ns	No
Row Factor	2.579	0.0177	*	Yes
Column Factor	27.46	<0.0001	****	Yes
ANOVA table	SS (Type III)	DF	MS	F (DFn, DFd)	P value
Interaction	112.5	8	14.06	F (8, 202) = 0.8707	P=0.5421
Row Factor	132.9	2	66.46	F (2, 202) = 4.116	P=0.0177
Column Factor	1415	4	353.8	F (4, 202) = 21.91	P<0.0001
Residual	3262	202	16.15
Data summary
Number of columns (Column Factor)	5
Number of rows (Row Factor)	3
Number of values	217
Compare column means (main column effect)
Number of families	1
Number of comparisons per family	10
Alpha	0.05
Tukey's multiple comparisons test	Predicted (LS) mean diff.	95.00% CI of diff.	Below threshold?	Summary	Adjusted P Value
C57BL6 (wt) vs. 0	8.393	5.782 to 11.00	Yes	****	<0.0001
C57BL6 (wt) vs. 5	5.46	3.032 to 7.888	Yes	****	<0.0001
C57BL6 (wt) vs. 10	4.41	2.035 to 6.785	Yes	****	<0.0001
C57BL6 (wt) vs. 20	4.787	2.534 to 7.039	Yes	****	<0.0001
0 vs. 5	-2.933	-5.670 to -0.1968	Yes	*	0.0289
0 vs. 10	-3.983	-6.673 to -1.293	Yes	***	0.0006
0 vs. 20	-3.607	-6.189 to -1.024	Yes	**	0.0015
5 vs. 10	-1.05	-3.562 to 1.462	No	ns	0.7792
5 vs. 20	-0.6733	-3.070 to 1.723	No	ns	0.938
10 vs. 20	0.3767	-1.966 to 2.720	No	ns	0.992
Test details	Predicted (LS) mean 1	Predicted (LS) mean 2	Predicted (LS) mean diff.	SE of diff.	N1	N2	q	DF
C57BL6 (wt) vs. 0	32.18	23.78	8.393	0.9487	49	34	12.51	202
C57BL6 (wt) vs. 5	32.18	26.72	5.46	0.8819	49	40	8.755	202
C57BL6 (wt) vs. 10	32.18	27.77	4.41	0.8628	49	41	7.229	202
C57BL6 (wt) vs. 20	32.18	27.39	4.787	0.8183	49	53	8.272	202
0 vs. 5	23.78	26.72	-2.933	0.9942	34	40	4.173	202
0 vs. 10	23.78	27.77	-3.983	0.9772	34	41	5.765	202
0 vs. 20	23.78	27.39	-3.607	0.9382	34	53	5.437	202
5 vs. 10	26.72	27.77	-1.05	0.9125	40	41	1.627	202
5 vs. 20	26.72	27.39	-0.6733	0.8706	40	53	1.094	202
10 vs. 20	27.77	27.39	0.3767	0.8512	41	53	0.6258	202
[truncated: 40 more columns]

## Sheet: Fig 3F
Source data for Fig 3F
	Nuc			Nuc/Cyto			Cyto			Absent
C57BL6 (wt)	85.7	91.6	85.7	8.9	3.6	5.5	5.4	3.6	4.4	0	1.2	4.4
0 µM	0	0	0	4	34.1	30.6	44	31.8	57.1	52	34.1	12.2
5 µM	0	0	0	44.2	45.2	41.2	44.2	29	29.4	11.6	25.8	29.4
10 µM	0	0	0	46.5	39	22.2	27.9	40.7	58.7	25.6	20.3	19
20 µM	0	1.4	0	56.3	57.5	36.4	32.8	26	38.4	10.9	15.1	25.3
Table Analyzed	FN1040 conc TDP
Two-way ANOVA	Ordinary
Alpha	0.05
Source of Variation	% of total variation	P value	P value summary	Significant?
Interaction	81.71	<0.0001	****	Yes
Row Factor	7.147e-06	>0.9999	ns	No
Column Factor	8.11	<0.0001	****	Yes
ANOVA table	SS	DF	MS	F (DFn, DFd)	P value
Interaction	26675	12	2223	F (12, 40) = 26.75	P<0.0001
Row Factor	0.002333	4	0.0005833	F (4, 40) = 7.019e-006	P>0.9999
Column Factor	2648	3	882.6	F (3, 40) = 10.62	P<0.0001
Residual	3324	40	83.11
Data summary
Number of columns (Column Factor)	4
Number of rows (Row Factor)	5
Number of values	60
Within each column, compare rows (simple effects within columns)
Number of families	4
Number of comparisons per family	10
Alpha	0.05
Tukey's multiple comparisons test	Mean Diff.	95.00% CI of diff.	Below threshold?	Summary	Adjusted P Value
Nuc
C57BL6 (wt) vs. 0 µM	87.67	66.41 to 108.9	Yes	****	<0.0001
C57BL6 (wt) vs. 5 µM	87.67	66.41 to 108.9	Yes	****	<0.0001
C57BL6 (wt) vs. 10 µM	87.67	66.41 to 108.9	Yes	****	<0.0001
C57BL6 (wt) vs. 20 µM	87.2	65.94 to 108.5	Yes	****	<0.0001
0 µM vs. 5 µM	0	-21.26 to 21.26	No	ns	>0.9999
0 µM vs. 10 µM	0	-21.26 to 21.26	No	ns	>0.9999
0 µM vs. 20 µM	-0.4667	-21.73 to 20.79	No	ns	>0.9999
5 µM vs. 10 µM	0	-21.26 to 21.26	No	ns	>0.9999
5 µM vs. 20 µM	-0.4667	-21.73 to 20.79	No	ns	>0.9999
10 µM vs. 20 µM	-0.4667	-21.73 to 20.79	No	ns	>0.9999
Nuc/Cyto
C57BL6 (wt) vs. 0 µM	-16.9	-38.16 to 4.359	No	ns	0.1758
C57BL6 (wt) vs. 5 µM	-37.53	-58.79 to -16.27	Yes	****	<0.0001
C57BL6 (wt) vs. 10 µM	-29.9	-51.16 to -8.641	Yes	**	0.0022
C57BL6 (wt) vs. 20 µM	-44.07	-65.33 to -22.81	Yes	****	<0.0001
0 µM vs. 5 µM	-20.63	-41.89 to 0.6256	No	ns	0.0608
0 µM vs. 10 µM	-13	-34.26 to 8.259	No	ns	0.4182
0 µM vs. 20 µM	-27.17	-48.43 to -5.908	Yes	**	0.0064
5 µM vs. 10 µM	7.633	-13.63 to 28.89	No	ns	0.8421
5 µM vs. 20 µM	-6.533	-27.79 to 14.73	No	ns	0.9034
10 µM vs. 20 µM	-14.17	-35.43 to 7.092	No	ns	0.3323
Cyto
C57BL6 (wt) vs. 0 µM	-39.83	-61.09 to -18.57	Yes	****	<0.0001
C57BL6 (wt) vs. 5 µM	-29.73	-50.99 to -8.474	Yes	**	0.0024
C57BL6 (wt) vs. 10 µM	-37.97	-59.23 to -16.71	Yes	****	<0.0001
C57BL6 (wt) vs. 20 µM	-27.93	-49.19 to -6.674	Yes	**	0.0048
0 µM vs. 5 µM	10.1	-11.16 to 31.36	No	ns	0.658
0 µM vs. 10 µM	1.867	-19.39 to 23.13	No	ns	0.9991
0 µM vs. 20 µM	11.9	-9.359 to 33.16	No	ns	0.5069
5 µM vs. 10 µM	-8.233	-29.49 to 13.03	No	ns	0.8023
5 µM vs. 20 µM	1.8	-19.46 to 23.06	No	ns	0.9992
10 µM vs. 20 µM	10.03	-11.23 to 31.29	No	ns	0.6635
Absent
C57BL6 (wt) vs. 0 µM	-30.9	-52.16 to -9.641	Yes	**	0.0015
C57BL6 (wt) vs. 5 µM	-20.4	-41.66 to 0.8589	No	ns	0.0654
C57BL6 (wt) vs. 10 µM	-19.77	-41.03 to 1.492	No	ns	0.0792
C57BL6 (wt) vs. 20 µM	-15.23	-36.49 to 6.026	No	ns	0.2633
0 µM vs. 5 µM	10.5	-10.76 to 31.76	No	ns	0.6246
0 µM vs. 10 µM	11.13	-10.13 to 32.39	No	ns	0.5712
0 µM vs. 20 µM	15.67	-5.592 to 36.93	No	ns	0.2381
5 µM vs. 10 µM	0.6333	-20.63 to 21.89	No	ns	>0.9999
5 µM vs. 20 µM	5.167	-16.09 to 26.43	No	ns	0.9566
10 µM vs. 20 µM	4.533	-16.73 to 25.79	No	ns	0.9728
Test details	Mean 1	Mean 2	Mean Diff.	SE of diff.	N1	N2	q	DF
Nuc
C57BL6 (wt) vs. 0 µM	87.67	0	87.67	7.443	3	3	16.66	40
C57BL6 (wt) vs. 5 µM	87.67	0	87.67	7.443	3	3	16.66	40
C57BL6 (wt) vs. 10 µM	87.67	0	87.67	7.443	3	3	16.66	40
C57BL6 (wt) vs. 20 µM	87.67	0.4667	87.2	7.443	3	3	16.57	40
0 µM vs. 5 µM	0	0	0	7.443	3	3	0	40
0 µM vs. 10 µM	0	0	0	7.443	3	3	0	40
0 µM vs. 20 µM	0	0.4667	-0.4667	7.443	3	3	0.08866	40
5 µM vs. 10 µM	0	0	0	7.443	3	3	0	40
5 µM vs. 20 µM	0	0.4667	-0.4667	7.443	3	3	0.08866	40
10 µM vs. 20 µM	0	0.4667	-0.4667	7.443	3	3	0.08866	40
Nuc/Cyto
C57BL6 (wt) vs. 0 µM	6	22.9	-16.9	7.443	3	3	3.211	40
C57BL6 (wt) vs. 5 µM	6	43.53	-37.53	7.443	3	3	7.131	40
C57BL6 (wt) vs. 10 µM	6	35.9	-29.9	7.443	3	3	5.681	40
C57BL6 (wt) vs. 20 µM	6	50.07	-44.07	7.443	3	3	8.373	40
0 µM vs. 5 µM	22.9	43.53	-20.63	7.443	3	3	3.92	40
0 µM vs. 10 µM	22.9	35.9	-13	7.443	3	3	2.47	40
0 µM vs. 20 µM	22.9	50.07	-27.17	7.443	3	3	5.162	40
5 µM vs. 10 µM	43.53	35.9	7.633	7.443	3	3	1.45	40
5 µM vs. 20 µM	43.53	50.07	-6.533	7.443	3	3	1.241	40
10 µM vs. 20 µM	35.9	50.07	-14.17	7.443	3	3	2.692	40
Cyto
C57BL6 (wt) vs. 0 µM	4.467	44.3	-39.83	7.443	3	3	7.568	40
C57BL6 (wt) vs. 5 µM	4.467	34.2	-29.73	7.443	3	3	5.649	40
C57BL6 (wt) vs. 10 µM	4.467	42.43	-37.97	7.443	3	3	7.214	40
C57BL6 (wt) vs. 20 µM	4.467	32.4	-27.93	7.443	3	3	5.307	40
0 µM vs. 5 µM	44.3	34.2	10.1	7.443	3	3	1.919	40
0 µM vs. 10 µM	44.3	42.43	1.867	7.443	3	3	0.3547	40
0 µM vs. 20 µM	44.3	32.4	11.9	7.443	3	3	2.261	40
5 µM vs. 10 µM	34.2	42.43	-8.233	7.443	3	3	1.564	40
5 µM vs. 20 µM	34.2	32.4	1.8	7.443	3	3	0.342	40
10 µM vs. 20 µM	42.43	32.4	10.03	7.443	3	3	1.906	40
Absent
C57BL6 (wt) vs. 0 µM	1.867	32.77	-30.9	7.443	3	3	5.871	40
C57BL6 (wt) vs. 5 µM	1.867	22.27	-20.4	7.443	3	3	3.876	40
C57BL6 (wt) vs. 10 µM	1.867	21.63	-19.77	7.443	3	3	3.756	40
C57BL6 (wt) vs. 20 µM	1.867	17.1	-15.23	7.443	3	3	2.894	40
0 µM vs. 5 µM	32.77	22.27	10.5	7.443	3	3	1.995	40
0 µM vs. 10 µM	32.77	21.63	11.13	7.443	3	3	2.115	40
0 µM vs. 20 µM	32.77	17.1	15.67	7.443	3	3	2.977	40
5 µM vs. 10 µM	22.27	21.63	0.6333	7.443	3	3	0.1203	40
5 µM vs. 20 µM	22.27	17.1	5.167	7.443	3	3	0.9816	40
10 µM vs. 20 µM	21.63	17.1	4.533	7.443	3	3	0.8613
