# Supplementary material for: Testing of the therapeutic efficacy and safety of AMPA receptor RNA aptamers in an ALS mouse model
Source: Life Sci Alliance. 2022 Jan 12;5(4):e202101193. doi: 10.26508/lsa.202101193 (PMC8761490; doi:10.26508/lsa.202101193)
Supplement: Supplementary file 6 [file LSA-2021-01193_TableS8.xlsx]

## Sheet: Fig S3E
Table S8. Statistical analysis of Fig S3E (TDP-43 localization)
Two-way ANOVA (ANOVA results)
Table Analyzed	FN1040&FN58 TDP
Two-way ANOVA	Ordinary
Alpha	0.05
Source of Variation	% of total variation	P value	P value summary	Significant?
Interaction	85.05	<0.0001	****	Yes
Row Factor	7.704e-06	>0.9999	ns	No
Column Factor	5.55	0.0018	**	Yes
ANOVA table	SS	DF	MS	F (DFn, DFd)	P value
Interaction	25297	9	2811	F (9, 32) = 32.17	P<0.0001
Row Factor	0.002292	3	0.0007639	F (3, 32) = 8.742e-006	P>0.9999
Column Factor	1651	3	550.3	F (3, 32) = 6.297	P=0.0018
Residual	2796	32	87.39
Data summary
Number of columns (Column Factor)	4
Number of rows (Row Factor)	4
Number of values	48
Two-way ANOVA (Multiple comparisons)
Within each column, compare rows (simple effects within columns)
Number of families	4
Number of comparisons per family	6
Alpha	0.05
Tukey's multiple comparisons test	Mean Diff.	95.00% CI of diff.	Below threshold?	Summary	Adjusted P Value
Nuc
C57BL6 (wt) vs. Vehicle	87.67	66.99 to 108.3	Yes	****	<0.0001
C57BL6 (wt) vs. FN1040	87.2	66.52 to 107.9	Yes	****	<0.0001
C57BL6 (wt) vs. FN58	87.67	66.99 to 108.3	Yes	****	<0.0001
Vehicle vs. FN1040	-0.4667	-21.15 to 20.21	No	ns	>0.9999
Vehicle vs. FN58	0	-20.68 to 20.68	No	ns	>0.9999
FN1040 vs. FN58	0.4667	-20.21 to 21.15	No	ns	>0.9999
Nuc/Cyto
C57BL6 (wt) vs. Vehicle	-16.9	-37.58 to 3.780	No	ns	0.1411
C57BL6 (wt) vs. FN1040	-44.07	-64.75 to -23.39	Yes	****	<0.0001
C57BL6 (wt) vs. FN58	-39.97	-60.65 to -19.29	Yes	****	<0.0001
Vehicle vs. FN1040	-27.17	-47.85 to -6.487	Yes	**	0.0062
Vehicle vs. FN58	-23.07	-43.75 to -2.387	Yes	*	0.0241
FN1040 vs. FN58	4.1	-16.58 to 24.78	No	ns	0.9493
Cyto
C57BL6 (wt) vs. Vehicle	-39.83	-60.51 to -19.15	Yes	****	<0.0001
C57BL6 (wt) vs. FN1040	-27.93	-48.61 to -7.254	Yes	**	0.0048
C57BL6 (wt) vs. FN58	-33.87	-54.55 to -13.19	Yes	***	0.0006
Vehicle vs. FN1040	11.9	-8.780 to 32.58	No	ns	0.4156
Vehicle vs. FN58	5.967	-14.71 to 26.65	No	ns	0.8622
FN1040 vs. FN58	-5.933	-26.61 to 14.75	No	ns	0.8641
Absent
C57BL6 (wt) vs. Vehicle	-30.9	-51.58 to -10.22	Yes	**	0.0017
C57BL6 (wt) vs. FN1040	-15.23	-35.91 to 5.446	No	ns	0.2107
C57BL6 (wt) vs. FN58	-13.87	-34.55 to 6.813	No	ns	0.2843
Vehicle vs. FN1040	15.67	-5.013 to 36.35	No	ns	0.1905
Vehicle vs. FN58	17.03	-3.646 to 37.71	No	ns	0.1364
FN1040 vs. FN58	1.367	-19.31 to 22.05	No	ns	0.9979
Test details	Mean 1	Mean 2	Mean Diff.	SE of diff.	N1	N2	q	DF
Nuc
C57BL6 (wt) vs. Vehicle	87.67	0	87.67	7.633	3	3	16.24	32
C57BL6 (wt) vs. FN1040	87.67	0.4667	87.2	7.633	3	3	16.16	32
C57BL6 (wt) vs. FN58	87.67	0	87.67	7.633	3	3	16.24	32
Vehicle vs. FN1040	0	0.4667	-0.4667	7.633	3	3	0.08647	32
Vehicle vs. FN58	0	0	0	7.633	3	3	0	32
FN1040 vs. FN58	0.4667	0	0.4667	7.633	3	3	0.08647	32
Nuc/Cyto
C57BL6 (wt) vs. Vehicle	6	22.9	-16.9	7.633	3	3	3.131	32
C57BL6 (wt) vs. FN1040	6	50.07	-44.07	7.633	3	3	8.165	32
C57BL6 (wt) vs. FN58	6	45.97	-39.97	7.633	3	3	7.405	32
Vehicle vs. FN1040	22.9	50.07	-27.17	7.633	3	3	5.034	32
Vehicle vs. FN58	22.9	45.97	-23.07	7.633	3	3	4.274	32
FN1040 vs. FN58	50.07	45.97	4.1	7.633	3	3	0.7597	32
Cyto
C57BL6 (wt) vs. Vehicle	4.467	44.3	-39.83	7.633	3	3	7.38	32
C57BL6 (wt) vs. FN1040	4.467	32.4	-27.93	7.633	3	3	5.176	32
C57BL6 (wt) vs. FN58	4.467	38.33	-33.87	7.633	3	3	6.275	32
Vehicle vs. FN1040	44.3	32.4	11.9	7.633	3	3	2.205	32
Vehicle vs. FN58	44.3	38.33	5.967	7.633	3	3	1.106	32
FN1040 vs. FN58	32.4	38.33	-5.933	7.633	3	3	1.099	32
Absent
C57BL6 (wt) vs. Vehicle	1.867	32.77	-30.9	7.633	3	3	5.725	32
C57BL6 (wt) vs. FN1040	1.867	17.1	-15.23	7.633	3	3	2.823	32
C57BL6 (wt) vs. FN58	1.867	15.73	-13.87	7.633	3	3	2.569	32
Vehicle vs. FN1040	32.77	17.1	15.67	7.633	3	3	2.903	32
Vehicle vs. FN58	32.77	15.73	17.03	7.633	3	3	3.156	32
FN1040 vs. FN58	17.1	15.73	1.367	7.633	3	3	0.2532	32
