# Supplementary material for: Testing of the therapeutic efficacy and safety of AMPA receptor RNA aptamers in an ALS mouse model
Source: Life Sci Alliance. 2022 Jan 12;5(4):e202101193. doi: 10.26508/lsa.202101193 (PMC8761490; doi:10.26508/lsa.202101193)
Supplement: Supplementary file 15 [file LSA-2021-01193_TableS7.xlsx]

## Sheet: Fig 4G
Table S7. Statistical analysis of Fig 4G (TDP-43 localization)
Two-way ANOVA (ANOVA results)
Table Analyzed	FN1040&FN58 Long TDP
Two-way ANOVA	Ordinary
Alpha	0.05
Source of Variation	% of total variation	P value	P value summary	Significant?
Interaction	60.41	<0.0001	****	Yes
Row Factor	3.163e-08	>0.9999	ns	No
Column Factor	19.73	<0.0001	****	Yes
ANOVA table	SS (Type III)	DF	MS	F (DFn, DFd)	P value
Interaction	112945	12	9412	F (12, 236) = 64.38	P<0.0001
Row Factor	5.913e-05	4	1.478e-05	F (4, 236) = 1.011e-007	P>0.9999
Column Factor	36893	3	12298	F (3, 236) = 84.11	P<0.0001
Residual	34504	236	146.2
Data summary
Number of columns (Column Factor)	4
Number of rows (Row Factor)	5
Number of values	256
Two-way ANOVA (Multiple comparisons)
Within each column, compare rows (simple effects within columns)
Number of families	4
Number of comparisons per family	10
Alpha	0.05
Tukey's multiple comparisons test	Predicted (LS) mean diff.	95.00% CI of diff.	Below threshold?	Summary	Adjusted P Value
Nuc
C57BL6 (wt) (n=12) vs. Non-treatment (n=13)	82.12	68.82 to 95.43	Yes	****	<0.0001
C57BL6 (wt) (n=12) vs. Vehicle (n=13)	84.56	71.25 to 97.86	Yes	****	<0.0001
C57BL6 (wt) (n=12) vs. FN1040 (n=13)	83.52	70.21 to 96.82	Yes	****	<0.0001
C57BL6 (wt) (n=12) vs. FN58 (n=13)	76.96	63.65 to 90.26	Yes	****	<0.0001
Non-treatment (n=13) vs. Vehicle (n=13)	2.435	-10.60 to 15.47	No	ns	0.986
Non-treatment (n=13) vs. FN1040 (n=13)	1.393	-11.64 to 14.43	No	ns	0.9984
Non-treatment (n=13) vs. FN58 (n=13)	-5.168	-18.21 to 7.870	No	ns	0.8118
Vehicle (n=13) vs. FN1040 (n=13)	-1.042	-14.08 to 12.00	No	ns	0.9995
Vehicle (n=13) vs. FN58 (n=13)	-7.603	-20.64 to 5.434	No	ns	0.4969
FN1040 (n=13) vs. FN58 (n=13)	-6.561	-19.60 to 6.477	No	ns	0.639
Nuc/Cyto
C57BL6 (wt) (n=12) vs. Non-treatment (n=13)	-22.13	-35.43 to -8.822	Yes	****	<0.0001
C57BL6 (wt) (n=12) vs. Vehicle (n=13)	-17.74	-31.05 to -4.437	Yes	**	0.0028
C57BL6 (wt) (n=12) vs. FN1040 (n=13)	-36.7	-50.00 to -23.39	Yes	****	<0.0001
C57BL6 (wt) (n=12) vs. FN58 (n=13)	-42.07	-55.38 to -28.77	Yes	****	<0.0001
Non-treatment (n=13) vs. Vehicle (n=13)	4.385	-8.653 to 17.42	No	ns	0.8872
Non-treatment (n=13) vs. FN1040 (n=13)	-14.57	-27.61 to -1.530	Yes	*	0.0199
Non-treatment (n=13) vs. FN58 (n=13)	-19.94	-32.98 to -6.907	Yes	***	0.0004
Vehicle (n=13) vs. FN1040 (n=13)	-18.95	-31.99 to -5.915	Yes	***	0.0008
Vehicle (n=13) vs. FN58 (n=13)	-24.33	-37.37 to -11.29	Yes	****	<0.0001
FN1040 (n=13) vs. FN58 (n=13)	-5.377	-18.41 to 7.661	No	ns	0.7885
Cyto
C57BL6 (wt) (n=12) vs. Non-treatment (n=13)	-58.62	-71.93 to -45.31	Yes	****	<0.0001
C57BL6 (wt) (n=12) vs. Vehicle (n=13)	-62.43	-75.73 to -49.12	Yes	****	<0.0001
C57BL6 (wt) (n=12) vs. FN1040 (n=13)	-51.12	-64.42 to -37.81	Yes	****	<0.0001
C57BL6 (wt) (n=12) vs. FN58 (n=13)	-47.5	-60.80 to -34.19	Yes	****	<0.0001
Non-treatment (n=13) vs. Vehicle (n=13)	-3.804	-16.84 to 9.234	No	ns	0.9298
Non-treatment (n=13) vs. FN1040 (n=13)	7.505	-5.533 to 20.54	No	ns	0.5102
Non-treatment (n=13) vs. FN58 (n=13)	11.12	-1.914 to 24.16	No	ns	0.1345
Vehicle (n=13) vs. FN1040 (n=13)	11.31	-1.729 to 24.35	No	ns	0.1232
Vehicle (n=13) vs. FN58 (n=13)	14.93	1.889 to 27.96	Yes	*	0.0158
FN1040 (n=13) vs. FN58 (n=13)	3.618	-9.419 to 16.66	No	ns	0.9409
Absent
C57BL6 (wt) (n=12) vs. Non-treatment (n=13)	-1.373	-14.68 to 11.93	No	ns	0.9986
C57BL6 (wt) (n=12) vs. Vehicle (n=13)	-4.391	-17.70 to 8.915	No	ns	0.894
C57BL6 (wt) (n=12) vs. FN1040 (n=13)	4.293	-9.013 to 17.60	No	ns	0.9016
C57BL6 (wt) (n=12) vs. FN58 (n=13)	12.62	-0.6888 to 25.92	No	ns	0.0724
Non-treatment (n=13) vs. Vehicle (n=13)	-3.018	-16.06 to 10.02	No	ns	0.969
Non-treatment (n=13) vs. FN1040 (n=13)	5.665	-7.372 to 18.70	No	ns	0.7545
Non-treatment (n=13) vs. FN58 (n=13)	13.99	0.9525 to 27.03	Yes	*	0.0286
Vehicle (n=13) vs. FN1040 (n=13)	8.684	-4.354 to 21.72	No	ns	0.3582
Vehicle (n=13) vs. FN58 (n=13)	17.01	3.971 to 30.05	Yes	**	0.0037
FN1040 (n=13) vs. FN58 (n=13)	8.325	-4.713 to 21.36	No	ns	0.4024
Test details	Predicted (LS) mean 1	Predicted (LS) mean 2	Predicted (LS) mean diff.	SE of diff.	N1	N2	q	DF
Nuc
C57BL6 (wt) (n=12) vs. Non-treatment (n=13)	84.67	2.545	82.12	4.84	12	13	23.99	236
C57BL6 (wt) (n=12) vs. Vehicle (n=13)	84.67	0.11	84.56	4.84	12	13	24.71	236
C57BL6 (wt) (n=12) vs. FN1040 (n=13)	84.67	1.152	83.52	4.84	12	13	24.4	236
C57BL6 (wt) (n=12) vs. FN58 (n=13)	84.67	7.713	76.96	4.84	12	13	22.48	236
Non-treatment (n=13) vs. Vehicle (n=13)	2.545	0.11	2.435	4.743	13	13	0.7262	236
Non-treatment (n=13) vs. FN1040 (n=13)	2.545	1.152	1.393	4.743	13	13	0.4154	236
Non-treatment (n=13) vs. FN58 (n=13)	2.545	7.713	-5.168	4.743	13	13	1.541	236
Vehicle (n=13) vs. FN1040 (n=13)	0.11	1.152	-1.042	4.743	13	13	0.3108	236
Vehicle (n=13) vs. FN58 (n=13)	0.11	7.713	-7.603	4.743	13	13	2.267	236
FN1040 (n=13) vs. FN58 (n=13)	1.152	7.713	-6.561	4.743	13	13	1.956	236
Nuc/Cyto
C57BL6 (wt) (n=12) vs. Non-treatment (n=13)	0.3808	22.51	-22.13	4.84	12	13	6.465	236
C57BL6 (wt) (n=12) vs. Vehicle (n=13)	0.3808	18.12	-17.74	4.84	12	13	5.184	236
C57BL6 (wt) (n=12) vs. FN1040 (n=13)	0.3808	37.08	-36.7	4.84	12	13	10.72	236
C57BL6 (wt) (n=12) vs. FN58 (n=13)	0.3808	42.45	-42.07	4.84	12	13	12.29	236
Non-treatment (n=13) vs. Vehicle (n=13)	22.51	18.12	4.385	4.743	13	13	1.307	236
Non-treatment (n=13) vs. FN1040 (n=13)	22.51	37.08	-14.57	4.743	13	13	4.344	236
Non-treatment (n=13) vs. FN58 (n=13)	22.51	42.45	-19.94	4.743	13	13	5.947	236
Vehicle (n=13) vs. FN1040 (n=13)	18.12	37.08	-18.95	4.743	13	13	5.651	236
Vehicle (n=13) vs. FN58 (n=13)	18.12	42.45	-24.33	4.743	13	13	7.255	236
FN1040 (n=13) vs. FN58 (n=13)	37.08	42.45	-5.377	4.743	13	13	1.603	236
Cyto
C57BL6 (wt) (n=12) vs. Non-treatment (n=13)	0.5333	59.15	-58.62	4.84	12	13	17.13	236
C57BL6 (wt) (n=12) vs. Vehicle (n=13)	0.5333	62.96	-62.43	4.84	12	13	18.24	236
C57BL6 (wt) (n=12) vs. FN1040 (n=13)	0.5333	51.65	-51.12	4.84	12	13	14.93	236
C57BL6 (wt) (n=12) vs. FN58 (n=13)	0.5333	48.03	-47.5	4.84	12	13	13.88	236
Non-treatment (n=13) vs. Vehicle (n=13)	59.15	62.96	-3.804	4.743	13	13	1.134	236
Non-treatment (n=13) vs. FN1040 (n=13)	59.15	51.65	7.505	4.743	13	13	2.238	236
Non-treatment (n=13) vs. FN58 (n=13)	59.15	48.03	11.12	4.743	13	13	3.317	236
Vehicle (n=13) vs. FN1040 (n=13)	62.96	51.65	11.31	4.743	13	13	3.372	236
Vehicle (n=13) vs. FN58 (n=13)	62.96	48.03	14.93	4.743	13	13	4.451	236
FN1040 (n=13) vs. FN58 (n=13)	51.65	48.03	3.618	4.743	13	13	1.079	236
Absent
C57BL6 (wt) (n=12) vs. Non-treatment (n=13)	14.42	15.79	-1.373	4.84	12	13	0.401	236
C57BL6 (wt) (n=12) vs. Vehicle (n=13)	14.42	18.81	-4.391	4.84	12	13	1.283	236
C57BL6 (wt) (n=12) vs. FN1040 (n=13)	14.42	10.12	4.293	4.84	12	13	1.254	236
C57BL6 (wt) (n=12) vs. FN58 (n=13)	14.42	1.8	12.62	4.84	12	13	3.686	236
Non-treatment (n=13) vs. Vehicle (n=13)	15.79	18.81	-3.018	4.743	13	13	0.9001	236
Non-treatment (n=13) vs. FN1040 (n=13)	15.79	10.12	5.665	4.743	13	13	1.689	236
Non-treatment (n=13) vs. FN58 (n=13)	15.79	1.8	13.99	4.743	13	13	4.172	236
Vehicle (n=13) vs. FN1040 (n=13)	18.81	10.12	8.684	4.743	13	13	2.589	236
Vehicle (n=13) vs. FN58 (n=13)	18.81	1.8	17.01	4.743	13	13	5.072	236
FN1040 (n=13) vs. FN58 (n=13)	10.12	1.8	8.325	4.743	13	13	2.482	236
