# Supplementary material for: Testing of the therapeutic efficacy and safety of AMPA receptor RNA aptamers in an ALS mouse model
Source: Life Sci Alliance. 2022 Jan 12;5(4):e202101193. doi: 10.26508/lsa.202101193 (PMC8761490; doi:10.26508/lsa.202101193)
Supplement: Supplementary file 16 [file LSA-2021-01193_TableS9.xlsx]

## Sheet: Fig S4A
Table S9. Statistical analysis of Fig S4A (rotarod-sec)
<each week>											<vs initial value>
Two-way ANOVA (ANOVA results)											Two-way ANOVA (ANOVA results)
Table Analyzed	Rotarod sec										Table Analyzed	Copy of Rotarod sec
Two-way ANOVA	Ordinary										Two-way ANOVA	Ordinary
Alpha	0.05										Alpha	0.05
Source of Variation	% of total variation	P value	P value summary	Significant?							Source of Variation	% of total variation	P value	P value summary	Significant?
Interaction	5.637	0.158	ns	No							Interaction	5.637	0.158	ns	No
Row Factor	4.116	0.0256	*	Yes							Row Factor	4.116	0.0256	*	Yes
Column Factor	4.801	<0.0001	****	Yes							Column Factor	4.801	<0.0001	****	Yes
ANOVA table	SS	DF	MS	F (DFn, DFd)	P value						ANOVA table	SS	DF	MS	F (DFn, DFd)	P value
Interaction	194997	30	6500	F (30, 576) = 1.267	P=0.1580						Interaction	194997	30	6500	F (30, 576) = 1.267	P=0.1580
Row Factor	142366	15	9491	F (15, 576) = 1.850	P=0.0256						Row Factor	142366	15	9491	F (15, 576) = 1.850	P=0.0256
Column Factor	166063	2	83031	F (2, 576) = 16.18	P<0.0001						Column Factor	166063	2	83031	F (2, 576) = 16.18	P<0.0001
Residual	2955573	576	5131								Residual	2955573	576	5131
Data summary											Data summary
Number of columns (Column Factor)	3										Number of columns (Column Factor)	3
Number of rows (Row Factor)	16										Number of rows (Row Factor)	16
Number of values	624										Number of values	624
Two-way ANOVA (Multiple comparisons)											Two-way ANOVA (Multiple comparisons)
Within each row, compare columns (simple effects within rows)											Within each column, compare rows (simple effects within columns)
Number of families	16										Number of families	3
Number of comparisons per family	3										Number of comparisons per family	15
Alpha	0.05										Alpha	0.05
Tukey's multiple comparisons test	Mean Diff.	95.00% CI of diff.	Below threshold?	Summary	Adjusted P Value						Dunnett's multiple comparisons test	Mean Diff.	95.00% CI of diff.	Below threshold?	Summary	Adjusted P Value
17											vehicle
vehicle vs. FN1040	16.52	-49.51 to 82.54	No	ns	0.8267						17 vs. 18	4.592	-75.15 to 84.34	No	ns	0.9998
vehicle vs. FN58	24.39	-41.63 to 90.41	No	ns	0.6608						17 vs. 19	-5.192	-84.94 to 74.55	No	ns	0.9997
FN1040 vs. FN58	7.871	-58.15 to 73.89	No	ns	0.9577						17 vs. 20	-21.68	-101.4 to 58.06	No	ns	0.9952
											17 vs. 21	-3.254	-83.00 to 76.49	No	ns	0.9999
18											17 vs. 22	-22.89	-102.6 to 56.85	No	ns	0.9913
vehicle vs. FN1040	-1.477	-67.50 to 64.54	No	ns	0.9985						17 vs. 23	4.208	-75.54 to 83.95	No	ns	0.9998
vehicle vs. FN58	2.358	-63.66 to 68.38	No	ns	0.9961						17 vs. 24	-0.2615	-80.01 to 79.48	No	ns	>0.9999
FN1040 vs. FN58	3.835	-62.19 to 69.86	No	ns	0.9898						17 vs. 25	3.023	-76.72 to 82.77	No	ns	0.9999
											17 vs. 26	11.79	-67.95 to 91.54	No	ns	0.9994
19											17 vs. 27	-13.24	-92.98 to 66.51	No	ns	0.9993
vehicle vs. FN1040	11.35	-54.67 to 77.37	No	ns	0.9139						17 vs. 28	20.32	-59.43 to 100.1	No	ns	0.9957
vehicle vs. FN58	6.836	-59.18 to 72.86	No	ns	0.9679						17 vs. 29	14.44	-65.31 to 94.18	No	ns	0.9993
FN1040 vs. FN58	-4.518	-70.54 to 61.50	No	ns	0.9858						17 vs. 30	12.13	-67.61 to 91.88	No	ns	0.9994
											17 vs. 31	13.01	-66.74 to 92.75	No	ns	0.9993
20											17 vs. 32	8.308	-71.44 to 88.05	No	ns	0.9996
vehicle vs. FN1040	10.12	-55.90 to 76.14	No	ns	0.931
vehicle vs. FN58	52.84	-13.18 to 118.9	No	ns	0.1452						FN1040
FN1040 vs. FN58	42.72	-23.30 to 108.7	No	ns	0.2821						17 vs. 18	-13.4	-93.14 to 66.34	No	ns	0.9993
											17 vs. 19	-10.35	-90.10 to 69.39	No	ns	0.9995
21											17 vs. 20	-28.08	-107.8 to 51.67	No	ns	0.9738
vehicle vs. FN1040	-5.423	-71.44 to 60.60	No	ns	0.9797						17 vs. 21	-25.19	-104.9 to 54.55	No	ns	0.9883
vehicle vs. FN58	4.948	-61.07 to 70.97	No	ns	0.983						17 vs. 22	-29.67	-109.4 to 50.08	No	ns	0.9592
FN1040 vs. FN58	10.37	-55.65 to 76.39	No	ns	0.9277						17 vs. 23	-51.55	-131.3 to 28.20	No	ns	0.4475
											17 vs. 24	-78.88	-158.6 to 0.8679	No	ns	0.0544
22											17 vs. 25	-78.54	-158.3 to 1.206	No	ns	0.0562
vehicle vs. FN1040	9.738	-56.28 to 75.76	No	ns	0.9359						17 vs. 26	-86.58	-166.3 to -6.840	Yes	*	0.0248
vehicle vs. FN58	-11.02	-77.04 to 55.01	No	ns	0.9188						17 vs. 27	-79.63	-159.4 to 0.1140	No	ns	0.0506
FN1040 vs. FN58	-20.75	-86.77 to 45.27	No	ns	0.7406						17 vs. 28	-83.28	-163.0 to -3.532	Yes	*	0.0351
											17 vs. 29	-82.02	-161.8 to -2.271	Yes	*	0.0399
23											17 vs. 30	-77.05	-156.8 to 2.699	No	ns	0.0648
vehicle vs. FN1040	-39.24	-105.3 to 26.78	No	ns	0.3434						17 vs. 31	-69.66	-149.4 to 10.08	No	ns	0.1251
vehicle vs. FN58	-29.26	-95.28 to 36.76	No	ns	0.5511						17 vs. 32	-82.62	-162.4 to -2.878	Yes	*	0.0375
FN1040 vs. FN58	9.981	-56.04 to 76.00	No	ns	0.9328
											FN58
24											17 vs. 18	-17.44	-97.18 to 62.31	No	ns	0.9991
vehicle vs. FN1040	-62.1	-128.1 to 3.921	No	ns	0.0703						17 vs. 19	-22.74	-102.5 to 57.00	No	ns	0.9916
vehicle vs. FN58	-14.63	-80.65 to 51.39	No	ns	0.8612						17 vs. 20	6.769	-72.98 to 86.51	No	ns	0.9997
FN1040 vs. FN58	47.47	-18.55 to 113.5	No	ns	0.2101						17 vs. 21	-22.69	-102.4 to 57.05	No	ns	0.9917
											17 vs. 22	-58.29	-138.0 to 21.45	No	ns	0.2947
25											17 vs. 23	-49.44	-129.2 to 30.31	No	ns	0.5022
vehicle vs. FN1040	-65.05	-131.1 to 0.9747	No	ns	0.0545						17 vs. 24	-39.28	-119.0 to 40.46	No	ns	0.7814
vehicle vs. FN58	-17.92	-83.94 to 48.10	No	ns	0.7993						17 vs. 25	-39.28	-119.0 to 40.46	No	ns	0.7814
FN1040 vs. FN58	47.13	-18.89 to 113.1	No	ns	0.2148						17 vs. 26	-51.63	-131.4 to 28.12	No	ns	0.4453
											17 vs. 27	-49.02	-128.8 to 30.72	No	ns	0.5132
26											17 vs. 28	-51.15	-130.9 to 28.59	No	ns	0.4573
vehicle vs. FN1040	-81.86	-147.9 to -15.84	Yes	*	0.0104						17 vs. 29	-54	-133.7 to 25.75	No	ns	0.3875
vehicle vs. FN58	-39.03	-105.1 to 26.99	No	ns	0.3472						17 vs. 30	-61.33	-141.1 to 18.41	No	ns	0.2386
FN1040 vs. FN58	42.83	-23.19 to 108.8	No	ns	0.2802						17 vs. 31	-42.07	-121.8 to 37.67	No	ns	0.7067
											17 vs. 32	-90.38	-170.1 to -10.64	Yes	*	0.0163
27
vehicle vs. FN1040	-49.88	-115.9 to 16.14	No	ns	0.1789
vehicle vs. FN58	-11.4	-77.42 to 54.62	No	ns	0.9133						Test details	Mean 1	Mean 2	Mean Diff.	SE of diff.	N1	N2	q	DF
FN1040 vs. FN58	38.48	-27.54 to 104.5	No	ns	0.3577
											vehicle
28											17 vs. 18	125.7	121.1	4.592	28.1	13	13	0.1634	576
vehicle vs. FN1040	-87.08	-153.1 to -21.06	Yes	**	0.0058						17 vs. 19	125.7	130.9	-5.192	28.1	13	13	0.1848	576
vehicle vs. FN58	-47.08	-113.1 to 18.94	No	ns	0.2154						17 vs. 20	125.7	147.4	-21.68	28.1	13	13	0.7718	576
FN1040 vs. FN58	39.99	-26.03 to 106.0	No	ns	0.3295						17 vs. 21	125.7	128.9	-3.254	28.1	13	13	0.1158	576
											17 vs. 22	125.7	148.6	-22.89	28.1	13	13	0.8148	576
29											17 vs. 23	125.7	121.5	4.208	28.1	13	13	0.1498	576
vehicle vs. FN1040	-79.94	-146.0 to -13.92	Yes	*	0.0128						17 vs. 24	125.7	125.9	-0.2615	28.1	13	13	0.009309	576
vehicle vs. FN58	-44.05	-110.1 to 21.97	No	ns	0.2605						17 vs. 25	125.7	122.6	3.023	28.1	13	13	0.1076	576
FN1040 vs. FN58	35.89	-30.13 to 101.9	No	ns	0.4086						17 vs. 26	125.7	113.9	11.79	28.1	13	13	0.4197	576
											17 vs. 27	125.7	138.9	-13.24	28.1	13	13	0.4712	576
30											17 vs. 28	125.7	105.4	20.32	28.1	13	13	0.7231	576
vehicle vs. FN1040	-72.66	-138.7 to -6.641	Yes	*	0.0269						17 vs. 29	125.7	111.2	14.44	28.1	13	13	0.5139	576
vehicle vs. FN58	-49.08	-115.1 to 16.94	No	ns	0.1888						17 vs. 30	125.7	113.5	12.13	28.1	13	13	0.4318	576
FN1040 vs. FN58	23.58	-42.44 to 89.60	No	ns	0.6787						17 vs. 31	125.7	112.7	13.01	28.1	13	13	0.463	576
											17 vs. 32	125.7	117.4	8.308	28.1	13	13	0.2957	576
31
vehicle vs. FN1040	-66.15	-132.2 to -0.1330	Yes	*	0.0494						FN1040
vehicle vs. FN58	-30.7	-96.72 to 35.32	No	ns	0.5191						17 vs. 18	109.2	122.6	-13.4	28.1	13	13	0.4769	576
FN1040 vs. FN58	35.46	-30.56 to 101.5	No	ns	0.4173						17 vs. 19	109.2	119.5	-10.35	28.1	13	13	0.3685	576
											17 vs. 20	109.2	137.2	-28.08	28.1	13	13	0.9993	576
32											17 vs. 21	109.2	134.3	-25.19	28.1	13	13	0.8966	576
vehicle vs. FN1040	-74.42	-140.4 to -8.395	Yes	*	0.0226						17 vs. 22	109.2	138.8	-29.67	28.1	13	13	1.056	576
vehicle vs. FN58	-74.3	-140.3 to -8.284	Yes	*	0.0228						17 vs. 23	109.2	160.7	-51.55	28.1	13	13	1.835	576
FN1040 vs. FN58	0.1108	-65.91 to 66.13	No	ns	>0.9999						17 vs. 24	109.2	188	-78.88	28.1	13	13	2.807	576
											17 vs. 25	109.2	187.7	-78.54	28.1	13	13	2.795	576
											17 vs. 26	109.2	195.7	-86.58	28.1	13	13	3.082	576
Test details	Mean 1	Mean 2	Mean Diff.	SE of diff.	N1	N2	q	DF			17 vs. 27	109.2	188.8	-79.63	28.1	13	13	2.834	576
											17 vs. 28	109.2	192.4	-83.28	28.1	13	13	2.964	576
17											17 vs. 29	109.2	191.2	-82.02	28.1	13	13	2.919	576
vehicle vs. FN1040	125.7	109.2	16.52	28.1	13	13	0.8313	576			17 vs. 30	109.2	186.2	-77.05	28.1	13	13	2.742	576
vehicle vs. FN58	125.7	101.3	24.39	28.1	13	13	1.227	576			17 vs. 31	109.2	178.8	-69.66	28.1	13	13	2.479	576
FN1040 vs. FN58	109.2	101.3	7.871	28.1	13	13	0.3962	576			17 vs. 32	109.2	191.8	-82.62	28.1	13	13	2.941	576
18											FN58
vehicle vs. FN1040	121.1	122.6	-1.477	28.1	13	13	0.07434	576			17 vs. 18	101.3	118.7	-17.44	28.1	13	13	0.6206	576
vehicle vs. FN58	121.1	118.7	2.358	28.1	13	13	0.1187	576			17 vs. 19	101.3	124	-22.74	28.1	13	13	0.8094	576
FN1040 vs. FN58	122.6	118.7	3.835	28.1	13	13	0.1931	576			17 vs. 20	101.3	94.51	6.769	28.1	13	13	0.2409	576
											17 vs. 21	101.3	124	-22.69	28.1	13	13	0.8076	576
19											17 vs. 22	101.3	159.6	-58.29	28.1	13	13	2.075	576
vehicle vs. FN1040	130.9	119.5	11.35	28.1	13	13	0.5715	576			17 vs. 23	101.3	150.7	-49.44	28.1	13	13	1.76	576
vehicle vs. FN58	130.9	124	6.836	28.1	13	13	0.3441	576			17 vs. 24	101.3	140.6	-39.28	28.1	13	13	1.398	576
FN1040 vs. FN58	119.5	124	-4.518	28.1	13	13	0.2274	576			17 vs. 25	101.3	140.6	-39.28	28.1	13	13	1.398	576
											17 vs. 26	101.3	152.9	-51.63	28.1	13	13	1.838	576
20											17 vs. 27	101.3	150.3	-49.02	28.1	13	13	1.745	576
vehicle vs. FN1040	147.4	137.2	10.12	28.1	13	13	0.5095	576			17 vs. 28	101.3	152.4	-51.15	28.1	13	13	1.821	576
vehicle vs. FN58	147.4	94.51	52.84	28.1	13	13	2.66	576			17 vs. 29	101.3	155.3	-54	28.1	13	13	1.922	576
FN1040 vs. FN58	137.2	94.51	42.72	28.1	13	13	2.15	576			17 vs. 30	101.3	162.6	-61.33	28.1	13	13	2.183	576
											17 vs. 31	101.3	143.4	-42.07	28.1	13	13	1.498	576
21											17 vs. 32	101.3	191.7	-90.38	28.1	13	13	3.217	576
vehicle vs. FN1040	128.9	134.3	-5.423	28.1	13	13	0.273	576
vehicle vs. FN58	128.9	124	4.948	28.1	13	13	0.2491	576
FN1040 vs. FN58	134.3	124	10.37	28.1	13	13	0.522	576
22
vehicle vs. FN1040	148.6	138.8	9.738	28.1	13	13	0.4902	576
vehicle vs. FN58	148.6	159.6	-11.02	28.1	13	13	0.5544	576
FN1040 vs. FN58	138.8	159.6	-20.75	28.1	13	13	1.045	576
23
vehicle vs. FN1040	121.5	160.7	-39.24	28.1	13	13	1.975	576
vehicle vs. FN58	121.5	150.7	-29.26	28.1	13	13	1.473	576
FN1040 vs. FN58	160.7	150.7	9.981	28.1	13	13	0.5024	576
24
vehicle vs. FN1040	125.9	188	-62.1	28.1	13	13	3.126	576
vehicle vs. FN58	125.9	140.6	-14.63	28.1	13	13	0.7365	576
FN1040 vs. FN58	188	140.6	47.47	28.1	13	13	2.389	576
25
vehicle vs. FN1040	122.6	187.7	-65.05	28.1	13	13	3.274	576
vehicle vs. FN58	122.6	140.6	-17.92	28.1	13	13	0.9019	576
FN1040 vs. FN58	187.7	140.6	47.13	28.1	13	13	2.372	576
26
vehicle vs. FN1040	113.9	195.7	-81.86	28.1	13	13	4.12	576
vehicle vs. FN58	113.9	152.9	-39.03	28.1	13	13	1.965	576
FN1040 vs. FN58	195.7	152.9	42.83	28.1	13	13	2.156	576
27
vehicle vs. FN1040	138.9	188.8	-49.88	28.1	13	13	2.511	576
vehicle vs. FN58	138.9	150.3	-11.4	28.1	13	13	0.5738	576
FN1040 vs. FN58	188.8	150.3	38.48	28.1	13	13	1.937	576
28
vehicle vs. FN1040	105.4	192.4	-87.08	28.1	13	13	4.383	576
vehicle vs. FN58	105.4	152.4	-47.08	28.1	13	13	2.37	576
FN1040 vs. FN58	192.4	152.4	39.99	28.1	13	13	2.013	576
29
vehicle vs. FN1040	111.2	191.2	-79.94	28.1	13	13	4.024	576
vehicle vs. FN58	111.2	155.3	-44.05	28.1	13	13	2.217	576
FN1040 vs. FN58	191.2	155.3	35.89	28.1	13	13	1.806	576
30
vehicle vs. FN1040	113.5	186.2	-72.66	28.1	13	13	3.657	576
vehicle vs. FN58	113.5	162.6	-49.08	28.1	13	13	2.47	576
FN1040 vs. FN58	186.2	162.6	23.58	28.1	13	13	1.187	576
31
vehicle vs. FN1040	112.7	178.8	-66.15	28.1	13	13	3.33	576
vehicle vs. FN58	112.7	143.4	-30.7	28.1	13	13	1.545	576
FN1040 vs. FN58	178.8	143.4	35.46	28.1	13	13	1.785	576
32
vehicle vs. FN1040	117.4	191.8	-74.42	28.1	13	13	3.746	576
vehicle vs. FN58	117.4	191.7	-74.3	28.1	13	13	3.74	576
FN1040 vs. FN58	191.8	191.7	0.1108	28.1	13	13	0.005575	576
